# Supplementary material
Source: publisher site journal article supplement (https://www.spandidos-publications.com/7566/downloadSupplementary)
Supplement: Supplementary file 1 [file downloadSupplementary]

Table SI. Sequences of primers used for reverse transcription-quantitative PCR.

| Gene name | Primer sequence (5'-3')      |
|-----------|------------------------------|
| Cyclin A  | F: AAATGGGCAGTACAGGAGGA      |
|           | R: CCACAGTCAGGGAGTGCTTT      |
| Cyclin B  | F: CATGGTGCACCTTCCTCCTT      |
|           | R: AGGTAATGTTGTAGAGTTGGTGTCC |
| Cyclin E  | F: GGCCAAAATCGACAGGAC        |
|           | R: GGGTCTGCACAGACTGCAT       |
| Cyclin D  | F: GCTGTGCATCTACACCGACA      |
|           | R: TTGAGCTTGTTACACAGGAG      |
| HMGB-1    | F: GCGAAGAACTGGGAGAGATGTG    |
|           | R: GCATCAGGCTTCCTTTAGCTCG    |

F, forward; R, reverse; HMGB-1, High mobility group box 1.
